# Supplementary material for: Endometriosis Associated-miRNome Analysis of Blood Samples: A Prospective Study
Source: MDPI journal article supplement (doi:10.3390/diagnostics12051150), 2022-05-05
Supplement: s1 [file s1]

**Table S1.** Performances of the 229 differentially expressed in the cohort.

| <b>miRNAs</b>     | <b>AUC</b> | <b>F1-Score</b> | <b>Sensitivity</b> | <b>Specificity</b> | <b>Up or Down</b> |
|-------------------|------------|-----------------|--------------------|--------------------|-------------------|
| hsa-miR-224-5p    | 0.459      | 0.568           | 0.461              | 0.457              | UP                |
| hsa-miR-3135b     | 0.577      | 0.773           | 0.74               | 0.413              | UP                |
| hsa-miR-11400     | 0.567      | 0.76            | 0.721              | 0.413              | UP                |
| hsa-miR-100-3p    | 0.532      | 0.226           | 0.13               | 0.935              | UP                |
| hsa-miR-10397-5p  | 0.539      | 0.246           | 0.143              | 0.935              | UP                |
| hsa-miR-1180-5p   | 0.564      | 0.867           | 0.955              | 0.174              | DOWN              |
| hsa-miR-1183      | 0.533      | 0.197           | 0.11               | 0.957              | UP                |
| hsa-miR-1185-5p   | 0.544      | 0.827           | 0.87               | 0.217              | DOWN              |
| hsa-miR-12113     | 0.526      | 0.871           | 0.987              | 0.065              | DOWN              |
| hsa-miR-12115     | 0.549      | 0.869           | 0.968              | 0.13               | DOWN              |
| hsa-miR-1231      | 0.55       | 0.861           | 0.948              | 0.152              | DOWN              |
| hsa-miR-1253      | 0.578      | 0.847           | 0.896              | 0.261              | DOWN              |
| hsa-miR-1256      | 0.568      | 0.408           | 0.266              | 0.87               | UP                |
| hsa-miR-1267      | 0.528      | 0.856           | 0.948              | 0.109              | DOWN              |
| hsa-miR-1286      | 0.536      | 0.133           | 0.071              | 1                  | UP                |
| hsa-miR-1298-3p   | 0.544      | 0.198           | 0.11               | 0.978              | UP                |
| hsa-miR-135a-2-3p | 0.544      | 0.198           | 0.11               | 0.978              | UP                |
| hsa-miR-146a-3p   | 0.577      | 0.609           | 0.481              | 0.674              | UP                |
| hsa-miR-153-5p    | 0.546      | 0.779           | 0.766              | 0.326              | DOWN              |
| hsa-miR-181b-3p   | 0.549      | 0.178           | 0.097              | 1                  | UP                |
| hsa-miR-1910-5p   | 0.555      | 0.875           | 0.981              | 0.13               | DOWN              |
| hsa-miR-1973      | 0.529      | 0.874           | 0.994              | 0.065              | DOWN              |
| hsa-miR-203a-5p   | 0.5        | 0               | 0                  | 1                  | DOWN              |
| hsa-miR-203b-3p   | 0.52       | 0.154           | 0.084              | 0.957              | UP                |
| hsa-miR-208a-3p   | 0.579      | 0.818           | 0.831              | 0.326              | DOWN              |
| hsa-miR-208a-5p   | 0.569      | 0.863           | 0.942              | 0.196              | DOWN              |
| hsa-miR-210-5p    | 0.582      | 0.418           | 0.273              | 0.891              | UP                |
| hsa-miR-211-3p    | 0.553      | 0.42            | 0.279              | 0.826              | UP                |
| hsa-miR-216b-3p   | 0.551      | 0.879           | 0.994              | 0.109              | DOWN              |
| hsa-miR-219a-5p   | 0.586      | 0.684           | 0.584              | 0.587              | UP                |
| hsa-miR-2681-3p   | 0.567      | 0.268           | 0.156              | 0.978              | UP                |
| hsa-miR-29b-1-5p  | 0.68       | 0.781           | 0.708              | 0.652              | UP                |
| hsa-miR-3059-3p   | 0.526      | 0.099           | 0.052              | 1                  | UP                |
| hsa-miR-3064-3p   | 0.574      | 0.851           | 0.909              | 0.239              | DOWN              |
| hsa-miR-3085-5p   | 0.541      | 0.87            | 0.974              | 0.109              | DOWN              |
| hsa-miR-3122      | 0.59       | 0.333           | 0.201              | 0.978              | UP                |
| hsa-miR-3128      | 0.598      | 0.456           | 0.305              | 0.891              | UP                |
| hsa-miR-3129-5p   | 0.549      | 0.412           | 0.273              | 0.826              | UP                |
| hsa-miR-3137      | 0.617      | 0.779           | 0.734              | 0.5                | DOWN              |

|                  |       |       |       |       |      |
|------------------|-------|-------|-------|-------|------|
| hsa-miR-3140-5p  | 0.546 | 0.237 | 0.136 | 0.957 | UP   |
| hsa-miR-3150a-5p | 0.5   | 0     | 0     | 1     | DOWN |
| hsa-miR-3155a    | 0.52  | 0.154 | 0.084 | 0.957 | UP   |
| hsa-miR-3156-5p  | 0.542 | 0.156 | 0.084 | 1     | UP   |
| hsa-miR-3159     | 0.563 | 0.82  | 0.844 | 0.283 | DOWN |
| hsa-miR-3168     | 0.618 | 0.803 | 0.779 | 0.457 | DOWN |
| hsa-miR-3180-5p  | 0.539 | 0.246 | 0.143 | 0.935 | UP   |
| hsa-miR-3185     | 0.566 | 0.878 | 0.981 | 0.152 | DOWN |
| hsa-miR-3189-3p  | 0.532 | 0.122 | 0.065 | 1     | UP   |
| hsa-miR-3193     | 0.551 | 0.218 | 0.123 | 0.978 | UP   |
| hsa-miR-3197     | 0.568 | 0.844 | 0.896 | 0.239 | DOWN |
| hsa-miR-323a-5p  | 0.55  | 0.247 | 0.143 | 0.957 | UP   |
| hsa-miR-33b-3p   | 0.543 | 0.227 | 0.13  | 0.957 | UP   |
| hsa-miR-346      | 0.415 | 0.725 | 0.721 | 0.109 | UP   |
| hsa-miR-3617-5p  | 0.57  | 0.502 | 0.357 | 0.783 | UP   |
| hsa-miR-3619-3p  | 0.593 | 0.342 | 0.208 | 0.978 | UP   |
| hsa-miR-3620-3p  | 0.563 | 0.286 | 0.169 | 0.957 | UP   |
| hsa-miR-3622a-3p | 0.5   | 0     | 0     | 1     | DOWN |
| hsa-miR-3648     | 0.574 | 0.823 | 0.844 | 0.304 | DOWN |
| hsa-miR-3663-3p  | 0.529 | 0.874 | 0.994 | 0.065 | DOWN |
| hsa-miR-3664-5p  | 0.556 | 0.267 | 0.156 | 0.957 | UP   |
| hsa-miR-370-5p   | 0.549 | 0.178 | 0.097 | 1     | UP   |
| hsa-miR-376a-5p  | 0.55  | 0.335 | 0.208 | 0.891 | UP   |
| hsa-miR-376b-5p  | 0.565 | 0.321 | 0.195 | 0.935 | UP   |
| hsa-miR-376c-5p  | 0.585 | 0.349 | 0.214 | 0.957 | UP   |
| hsa-miR-380-5p   | 0.528 | 0.144 | 0.078 | 0.978 | UP   |
| hsa-miR-3907     | 0.56  | 0.337 | 0.208 | 0.913 | UP   |
| hsa-miR-3923     | 0.557 | 0.868 | 0.961 | 0.152 | DOWN |
| hsa-miR-3928-5p  | 0.547 | 0.858 | 0.942 | 0.152 | DOWN |
| hsa-miR-3944-3p  | 0.54  | 0.851 | 0.929 | 0.152 | DOWN |
| hsa-miR-410-5p   | 0.539 | 0.145 | 0.078 | 1     | UP   |
| hsa-miR-411-5p   | 0.558 | 0.699 | 0.617 | 0.5   | UP   |
| hsa-miR-4261     | 0.595 | 0.864 | 0.929 | 0.261 | DOWN |
| hsa-miR-4290     | 0.541 | 0.187 | 0.104 | 0.978 | UP   |
| hsa-miR-4307     | 0.534 | 0.87  | 0.981 | 0.087 | DOWN |
| hsa-miR-4421     | 0.536 | 0.236 | 0.136 | 0.935 | UP   |
| hsa-miR-4424     | 0.543 | 0.227 | 0.13  | 0.957 | UP   |
| hsa-miR-4430     | 0.574 | 0.424 | 0.279 | 0.87  | UP   |
| hsa-miR-4433a-3p | 0.558 | 0.384 | 0.247 | 0.87  | UP   |
| hsa-miR-4436b-3p | 0.566 | 0.45  | 0.305 | 0.826 | UP   |
| hsa-miR-4468     | 0.527 | 0.175 | 0.097 | 0.957 | UP   |

|                  |       |       |       |       |      |
|------------------|-------|-------|-------|-------|------|
| hsa-miR-4474-3p  | 0.556 | 0.427 | 0.286 | 0.826 | UP   |
| hsa-miR-4477b    | 0.59  | 0.525 | 0.377 | 0.804 | UP   |
| hsa-miR-4484     | 0.552 | 0.44  | 0.299 | 0.804 | UP   |
| hsa-miR-4493     | 0.547 | 0.301 | 0.182 | 0.913 | UP   |
| hsa-miR-4502     | 0.57  | 0.437 | 0.292 | 0.848 | UP   |
| hsa-miR-4512     | 0.56  | 0.871 | 0.968 | 0.152 | DOWN |
| hsa-miR-4518     | 0.548 | 0.208 | 0.117 | 0.978 | UP   |
| hsa-miR-4524a-5p | 0.529 | 0.11  | 0.058 | 1     | UP   |
| hsa-miR-4524b-5p | 0.565 | 0.321 | 0.195 | 0.935 | UP   |
| hsa-miR-4525     | 0.595 | 0.738 | 0.669 | 0.522 | UP   |
| hsa-miR-4531     | 0.55  | 0.247 | 0.143 | 0.957 | UP   |
| hsa-miR-4536-3p  | 0.549 | 0.178 | 0.097 | 1     | UP   |
| hsa-miR-4536-5p  | 0.555 | 0.293 | 0.175 | 0.935 | UP   |
| hsa-miR-4638-3p  | 0.538 | 0.357 | 0.227 | 0.848 | UP   |
| hsa-miR-4639-3p  | 0.552 | 0.188 | 0.104 | 1     | UP   |
| hsa-miR-4642     | 0.565 | 0.4   | 0.26  | 0.87  | UP   |
| hsa-miR-4645-5p  | 0.577 | 0.805 | 0.805 | 0.348 | DOWN |
| hsa-miR-4647     | 0.539 | 0.145 | 0.078 | 1     | UP   |
| hsa-miR-4649-5p  | 0.532 | 0.122 | 0.065 | 1     | UP   |
| hsa-miR-4674     | 0.57  | 0.797 | 0.792 | 0.348 | DOWN |
| hsa-miR-4679     | 0.533 | 0.197 | 0.11  | 0.957 | UP   |
| hsa-miR-4688     | 0.587 | 0.454 | 0.305 | 0.87  | UP   |
| hsa-miR-4689     | 0.577 | 0.452 | 0.305 | 0.848 | UP   |
| hsa-miR-4693-3p  | 0.5   | 0     | 0     | 1     | DOWN |
| hsa-miR-4701-3p  | 0.544 | 0.198 | 0.11  | 0.978 | UP   |
| hsa-miR-4703-3p  | 0.539 | 0.145 | 0.078 | 1     | UP   |
| hsa-miR-4703-5p  | 0.551 | 0.879 | 0.994 | 0.109 | DOWN |
| hsa-miR-4709-3p  | 0.532 | 0.122 | 0.065 | 1     | UP   |
| hsa-miR-4712-3p  | 0.557 | 0.328 | 0.201 | 0.913 | UP   |
| hsa-miR-4715-5p  | 0.587 | 0.324 | 0.195 | 0.978 | UP   |
| hsa-miR-4719     | 0.57  | 0.363 | 0.227 | 0.913 | UP   |
| hsa-miR-4724-5p  | 0.527 | 0.175 | 0.097 | 0.957 | UP   |
| hsa-miR-4725-5p  | 0.537 | 0.874 | 0.987 | 0.087 | DOWN |
| hsa-miR-4726-5p  | 0.557 | 0.328 | 0.201 | 0.913 | UP   |
| hsa-miR-4740-5p  | 0.5   | 0     | 0     | 1     | DOWN |
| hsa-miR-4747-3p  | 0.541 | 0.187 | 0.104 | 0.978 | UP   |
| hsa-miR-4748     | 0.605 | 0.714 | 0.623 | 0.587 | UP   |
| hsa-miR-4749-5p  | 0.58  | 0.777 | 0.747 | 0.413 | DOWN |
| hsa-miR-4750-3p  | 0.529 | 0.874 | 0.994 | 0.065 | DOWN |
| hsa-miR-4758-5p  | 0.575 | 0.814 | 0.825 | 0.326 | DOWN |
| hsa-miR-4762-5p  | 0.572 | 0.84  | 0.883 | 0.261 | DOWN |

|                  |       |       |       |       |      |
|------------------|-------|-------|-------|-------|------|
| hsa-miR-4764-5p  | 0.529 | 0.874 | 0.994 | 0.065 | DOWN |
| hsa-miR-4765     | 0.561 | 0.249 | 0.143 | 0.978 | UP   |
| hsa-miR-4779     | 0.545 | 0.265 | 0.156 | 0.935 | UP   |
| hsa-miR-4783-3p  | 0.539 | 0.246 | 0.143 | 0.935 | UP   |
| hsa-miR-4784     | 0.568 | 0.537 | 0.396 | 0.739 | UP   |
| hsa-miR-4787-3p  | 0.546 | 0.865 | 0.961 | 0.13  | DOWN |
| hsa-miR-4796-5p  | 0.587 | 0.865 | 0.935 | 0.239 | DOWN |
| hsa-miR-487a-3p  | 0.56  | 0.337 | 0.208 | 0.913 | UP   |
| hsa-miR-5001-5p  | 0.528 | 0.809 | 0.838 | 0.217 | UP   |
| hsa-miR-5004-3p  | 0.562 | 0.882 | 0.994 | 0.13  | DOWN |
| hsa-miR-5007-5p  | 0.555 | 0.199 | 0.11  | 1     | UP   |
| hsa-miR-503-3p   | 0.541 | 0.438 | 0.299 | 0.783 | UP   |
| hsa-miR-504-3p   | 0.567 | 0.871 | 0.961 | 0.174 | DOWN |
| hsa-miR-5089-3p  | 0.532 | 0.86  | 0.955 | 0.109 | DOWN |
| hsa-miR-509-3-5p | 0.529 | 0.11  | 0.058 | 1     | UP   |
| hsa-miR-513b-3p  | 0.543 | 0.227 | 0.13  | 0.957 | UP   |
| hsa-miR-514b-5p  | 0.555 | 0.875 | 0.981 | 0.13  | DOWN |
| hsa-miR-515-3p   | 0.486 | 0.839 | 0.929 | 0.043 | UP   |
| hsa-miR-515-5p   | 0.604 | 0.422 | 0.273 | 0.935 | UP   |
| hsa-miR-517c-3p  | 0.454 | 0.072 | 0.039 | 0.87  | DOWN |
| hsa-miR-5192     | 0.583 | 0.529 | 0.383 | 0.783 | UP   |
| hsa-miR-519d-3p  | 0.53  | 0.867 | 0.974 | 0.087 | DOWN |
| hsa-miR-520d-3p  | 0.545 | 0.167 | 0.091 | 1     | UP   |
| hsa-miR-525-5p   | 0.516 | 0.063 | 0.032 | 1     | UP   |
| hsa-miR-541-3p   | 0.535 | 0.166 | 0.091 | 0.978 | UP   |
| hsa-miR-548as-3p | 0.564 | 0.346 | 0.214 | 0.913 | UP   |
| hsa-miR-548as-5p | 0.562 | 0.507 | 0.364 | 0.761 | UP   |
| hsa-miR-548av-5p | 0.592 | 0.441 | 0.292 | 0.891 | UP   |
| hsa-miR-548j-3p  | 0.586 | 0.591 | 0.455 | 0.717 | UP   |
| hsa-miR-548j-5p  | 0.628 | 0.616 | 0.474 | 0.783 | UP   |
| hsa-miR-551b-3p  | 0.552 | 0.188 | 0.104 | 1     | UP   |
| hsa-miR-568      | 0.487 | 0.831 | 0.909 | 0.065 | UP   |
| hsa-miR-5688     | 0.539 | 0.145 | 0.078 | 1     | UP   |
| hsa-miR-5698     | 0.549 | 0.479 | 0.338 | 0.761 | UP   |
| hsa-miR-5703     | 0.557 | 0.868 | 0.961 | 0.152 | DOWN |
| hsa-miR-573      | 0.54  | 0.851 | 0.929 | 0.152 | DOWN |
| hsa-miR-597-5p   | 0.533 | 0.197 | 0.11  | 0.957 | UP   |
| hsa-miR-600      | 0.535 | 0.166 | 0.091 | 0.978 | UP   |
| hsa-miR-601      | 0.585 | 0.854 | 0.909 | 0.261 | DOWN |
| hsa-miR-605-3p   | 0.537 | 0.299 | 0.182 | 0.891 | UP   |
| hsa-miR-6070     | 0.568 | 0.844 | 0.896 | 0.239 | DOWN |

|                  |       |       |       |       |      |
|------------------|-------|-------|-------|-------|------|
| hsa-miR-6074     | 0.548 | 0.208 | 0.117 | 0.978 | UP   |
| hsa-miR-6075     | 0.562 | 0.856 | 0.929 | 0.196 | DOWN |
| hsa-miR-6081     | 0.588 | 0.857 | 0.916 | 0.261 | DOWN |
| hsa-miR-6082     | 0.542 | 0.156 | 0.084 | 1     | UP   |
| hsa-miR-6084     | 0.534 | 0.844 | 0.916 | 0.152 | DOWN |
| hsa-miR-6132     | 0.5   | 0     | 0     | 1     | UP   |
| hsa-miR-616-5p   | 0.582 | 0.6   | 0.468 | 0.696 | UP   |
| hsa-miR-649      | 0.524 | 0.834 | 0.896 | 0.152 | DOWN |
| hsa-miR-6502-5p  | 0.603 | 0.443 | 0.292 | 0.913 | UP   |
| hsa-miR-6507-5p  | 0.537 | 0.299 | 0.182 | 0.891 | UP   |
| hsa-miR-6513-5p  | 0.571 | 0.544 | 0.403 | 0.739 | UP   |
| hsa-miR-659-3p   | 0.539 | 0.145 | 0.078 | 1     | UP   |
| hsa-miR-6722-3p  | 0.556 | 0.267 | 0.156 | 0.957 | UP   |
| hsa-miR-6726-5p  | 0.556 | 0.267 | 0.156 | 0.957 | UP   |
| hsa-miR-6731-3p  | 0.554 | 0.229 | 0.13  | 0.978 | UP   |
| hsa-miR-6733-5p  | 0.556 | 0.849 | 0.916 | 0.196 | DOWN |
| hsa-miR-676-5p   | 0.52  | 0.154 | 0.084 | 0.957 | UP   |
| hsa-miR-6761-3p  | 0.542 | 0.156 | 0.084 | 1     | UP   |
| hsa-miR-6780b-3p | 0.532 | 0.316 | 0.195 | 0.87  | UP   |
| hsa-miR-6786-5p  | 0.586 | 0.591 | 0.455 | 0.717 | UP   |
| hsa-miR-6787-3p  | 0.54  | 0.217 | 0.123 | 0.957 | UP   |
| hsa-miR-6788-3p  | 0.545 | 0.873 | 0.981 | 0.109 | DOWN |
| hsa-miR-6788-5p  | 0.545 | 0.167 | 0.091 | 1     | UP   |
| hsa-miR-6790-5p  | 0.542 | 0.256 | 0.149 | 0.935 | UP   |
| hsa-miR-6794-5p  | 0.56  | 0.337 | 0.208 | 0.913 | UP   |
| hsa-miR-6795-5p  | 0.557 | 0.328 | 0.201 | 0.913 | UP   |
| hsa-miR-6797-5p  | 0.538 | 0.176 | 0.097 | 0.978 | UP   |
| hsa-miR-6799-3p  | 0.564 | 0.867 | 0.955 | 0.174 | DOWN |
| hsa-miR-6805-3p  | 0.522 | 0.121 | 0.065 | 0.978 | UP   |
| hsa-miR-6806-5p  | 0.561 | 0.837 | 0.883 | 0.239 | DOWN |
| hsa-miR-6809-3p  | 0.581 | 0.858 | 0.922 | 0.239 | DOWN |
| hsa-miR-6810-5p  | 0.564 | 0.422 | 0.279 | 0.848 | UP   |
| hsa-miR-6811-3p  | 0.549 | 0.869 | 0.968 | 0.13  | DOWN |
| hsa-miR-6817-5p  | 0.548 | 0.359 | 0.227 | 0.87  | UP   |
| hsa-miR-6819-3p  | 0.544 | 0.198 | 0.11  | 0.978 | UP   |
| hsa-miR-6821-3p  | 0.534 | 0.87  | 0.981 | 0.087 | DOWN |
| hsa-miR-6822-3p  | 0.518 | 0.872 | 0.994 | 0.043 | DOWN |
| hsa-miR-6824-3p  | 0.552 | 0.872 | 0.974 | 0.13  | DOWN |
| hsa-miR-6825-3p  | 0.538 | 0.176 | 0.097 | 0.978 | UP   |
| hsa-miR-6840-3p  | 0.526 | 0.871 | 0.987 | 0.065 | DOWN |
| hsa-miR-6847-3p  | 0.531 | 0.155 | 0.084 | 0.978 | UP   |

|                 |       |       |       |       |      |
|-----------------|-------|-------|-------|-------|------|
| hsa-miR-6855-3p | 0.584 | 0.667 | 0.558 | 0.609 | UP   |
| hsa-miR-6860    | 0.531 | 0.254 | 0.149 | 0.913 | UP   |
| hsa-miR-6865-5p | 0.565 | 0.321 | 0.195 | 0.935 | UP   |
| hsa-miR-6869-3p | 0.516 | 0.174 | 0.097 | 0.935 | UP   |
| hsa-miR-6875-3p | 0.553 | 0.865 | 0.955 | 0.152 | DOWN |
| hsa-miR-6879-5p | 0.579 | 0.479 | 0.331 | 0.826 | UP   |
| hsa-miR-6890-5p | 0.58  | 0.306 | 0.182 | 0.978 | UP   |
| hsa-miR-7106-5p | 0.539 | 0.145 | 0.078 | 1     | UP   |
| hsa-miR-7107-3p | 0.532 | 0.833 | 0.89  | 0.174 | DOWN |
| hsa-miR-7108-3p | 0.594 | 0.816 | 0.818 | 0.37  | DOWN |
| hsa-miR-7109-5p | 0.549 | 0.869 | 0.968 | 0.13  | DOWN |
| hsa-miR-7111-5p | 0.538 | 0.273 | 0.162 | 0.913 | UP   |
| hsa-miR-7113-3p | 0.554 | 0.229 | 0.13  | 0.978 | UP   |
| hsa-miR-7150    | 0.57  | 0.855 | 0.922 | 0.217 | DOWN |
| hsa-miR-7152-5p | 0.5   | 0     | 0     | 1     | DOWN |
| hsa-miR-7156-5p | 0.483 | 0.835 | 0.922 | 0.043 | UP   |
| hsa-miR-762     | 0.567 | 0.354 | 0.221 | 0.913 | UP   |
| hsa-miR-767-5p  | 0.513 | 0.051 | 0.026 | 1     | UP   |
| hsa-miR-7852-3p | 0.544 | 0.198 | 0.11  | 0.978 | UP   |
| hsa-miR-8073    | 0.549 | 0.842 | 0.903 | 0.196 | DOWN |
| hsa-miR-8086    | 0.546 | 0.237 | 0.136 | 0.957 | UP   |
| hsa-miR-887-5p  | 0.529 | 0.216 | 0.123 | 0.935 | UP   |
| hsa-miR-889-5p  | 0.563 | 0.875 | 0.974 | 0.152 | DOWN |
| hsa-miR-943     | 0.534 | 0.264 | 0.156 | 0.913 | UP   |
| hsa-miR-9899    | 0.544 | 0.855 | 0.935 | 0.152 | DOWN |
| hsa-miR-9901    | 0.526 | 0.206 | 0.117 | 0.935 | UP   |
